# Supplementary material
Source: PubMed Central journal article supplement (PMC4889506)
Supplement: NIHMS782859-supplement.pdf [file NIHMS782859-supplement.pdf]

# Figure S1

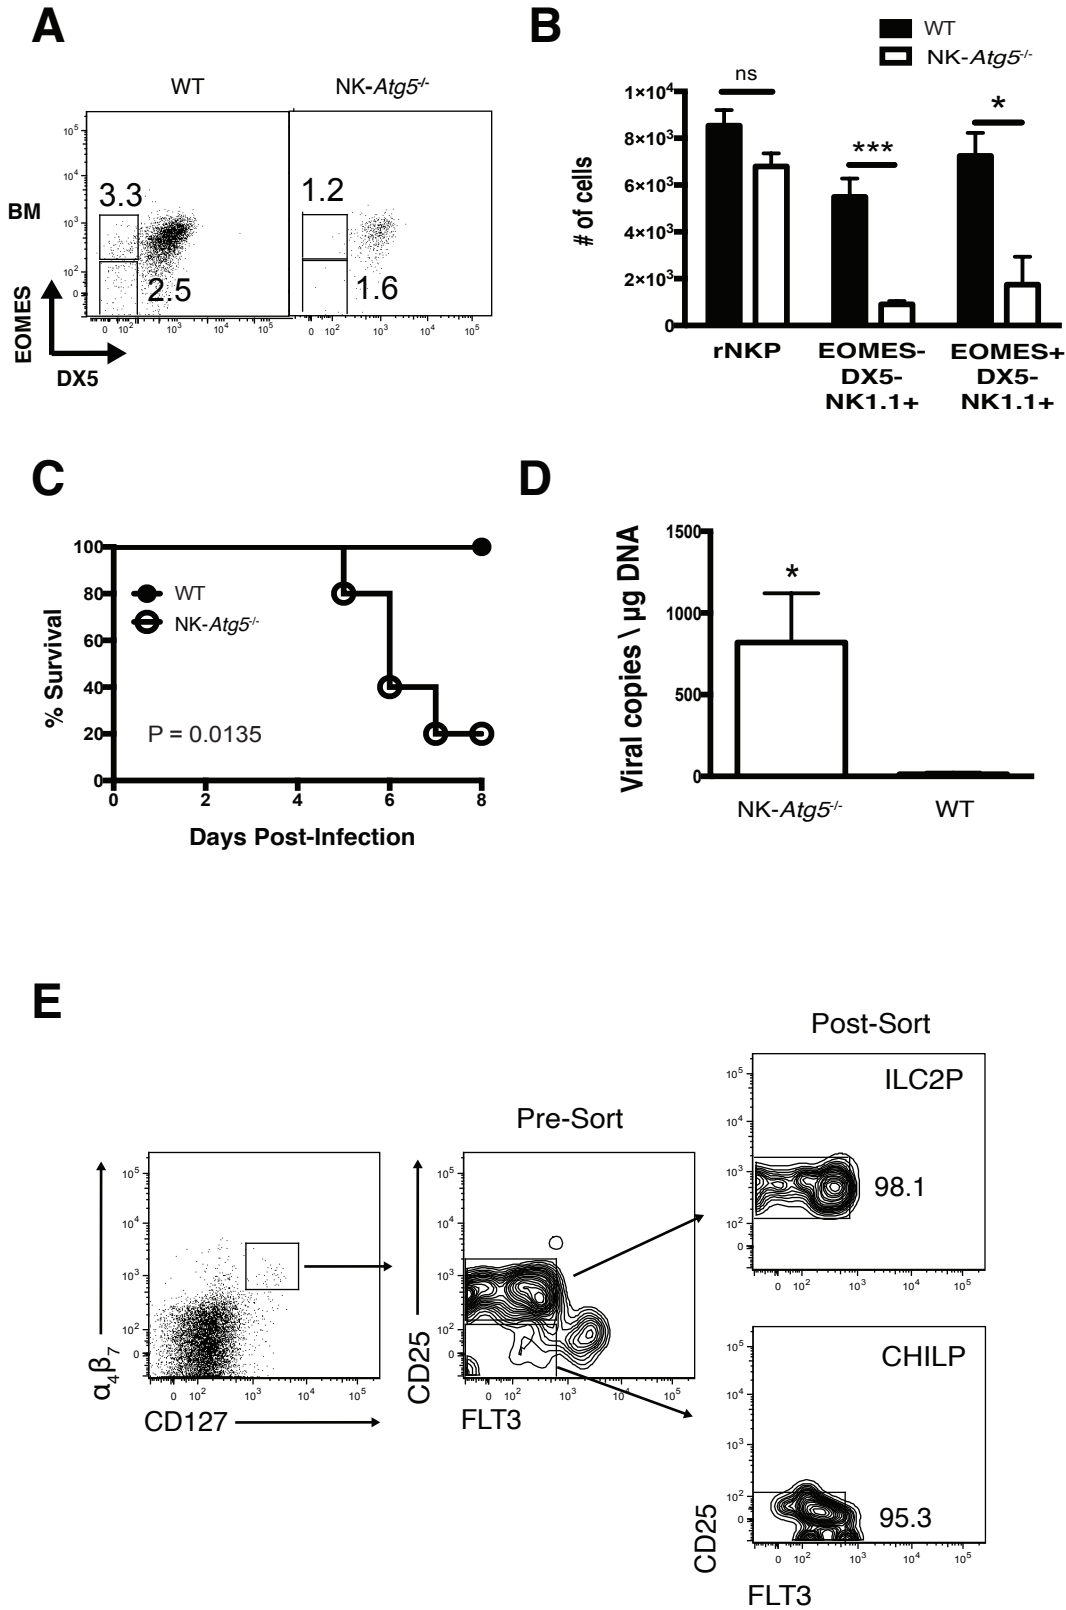

# Figure S2

**A**

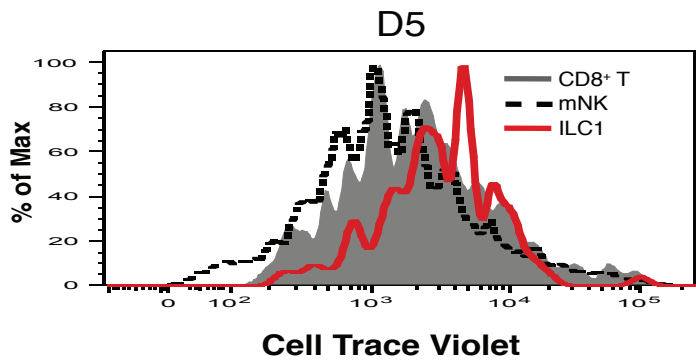

**B**

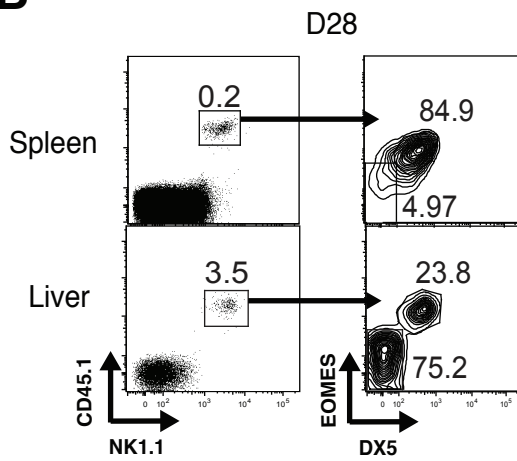

**C**

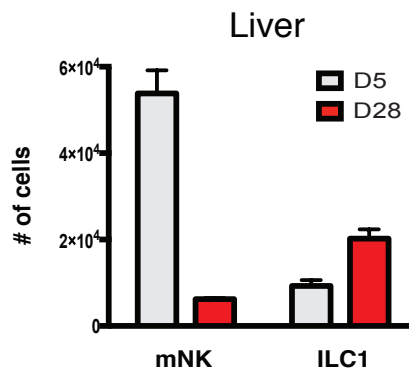

**D**

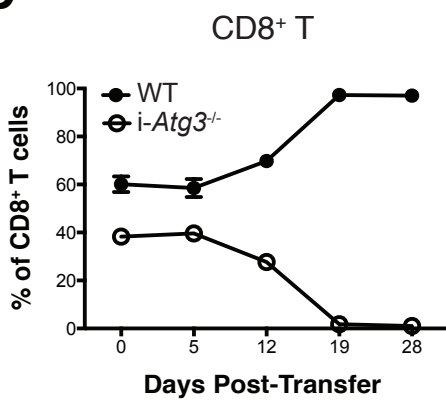

**E**

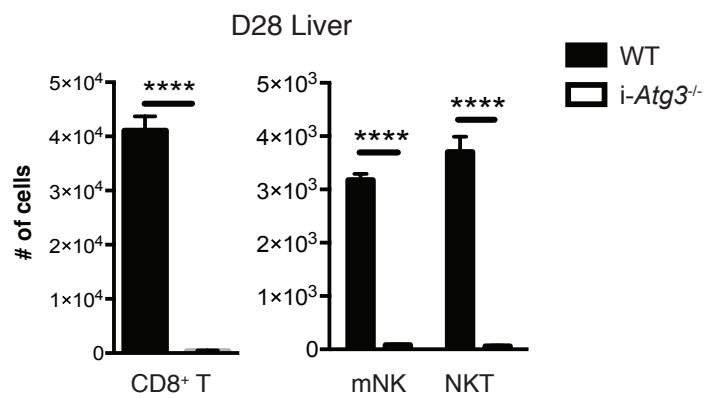

# Figure S3

**A**

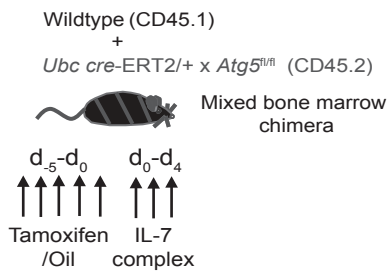

**B**

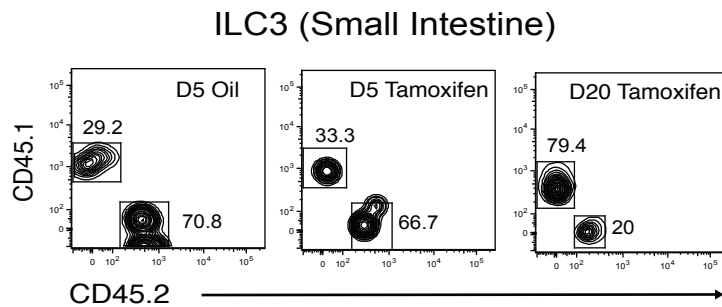

**C**

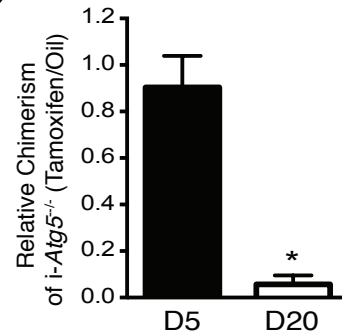

**D**

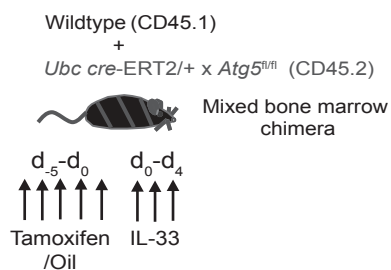

**E**

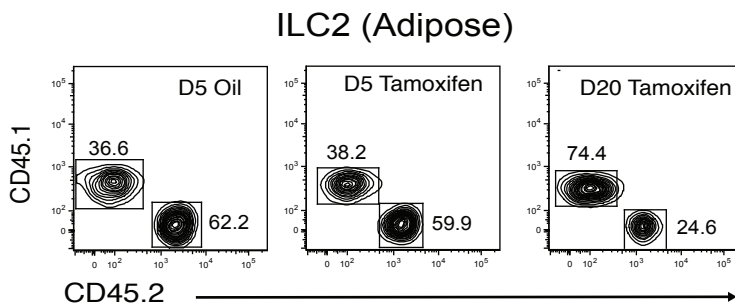

**F**

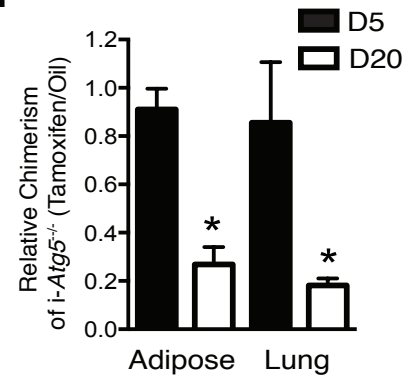

**G**

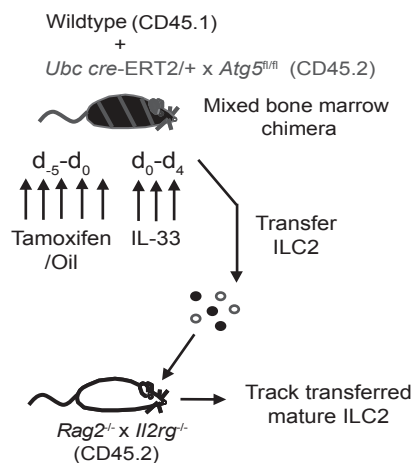

**H**

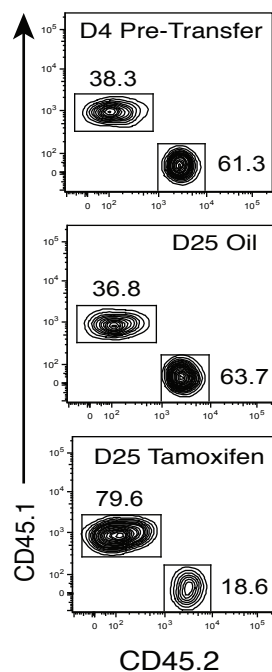

**I**

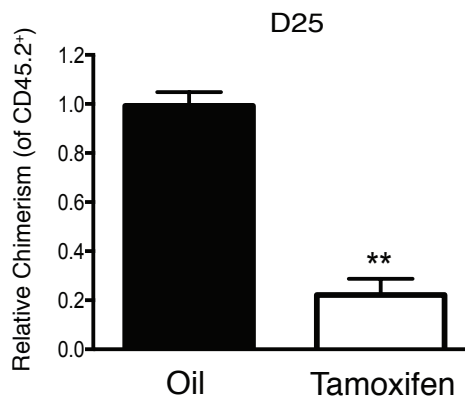

# Figure S4

**A**

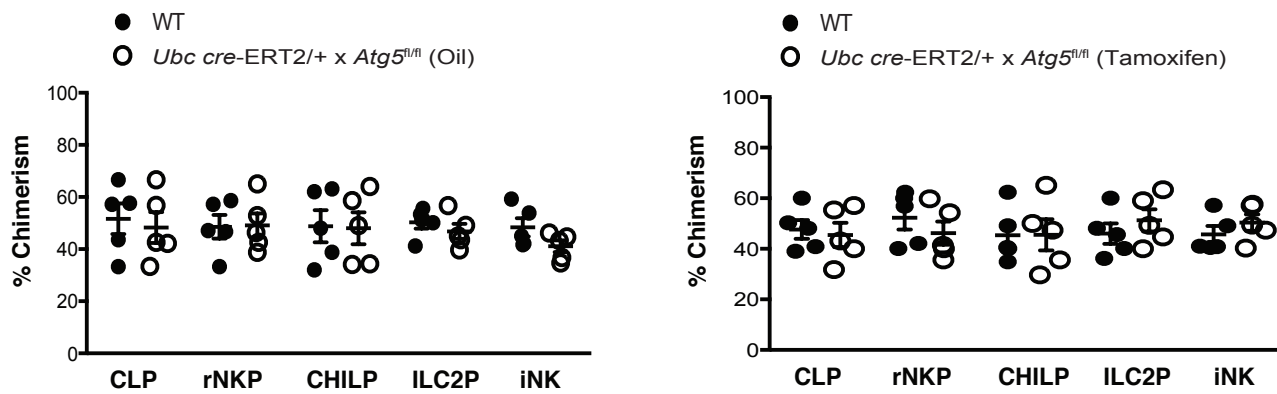

**B**

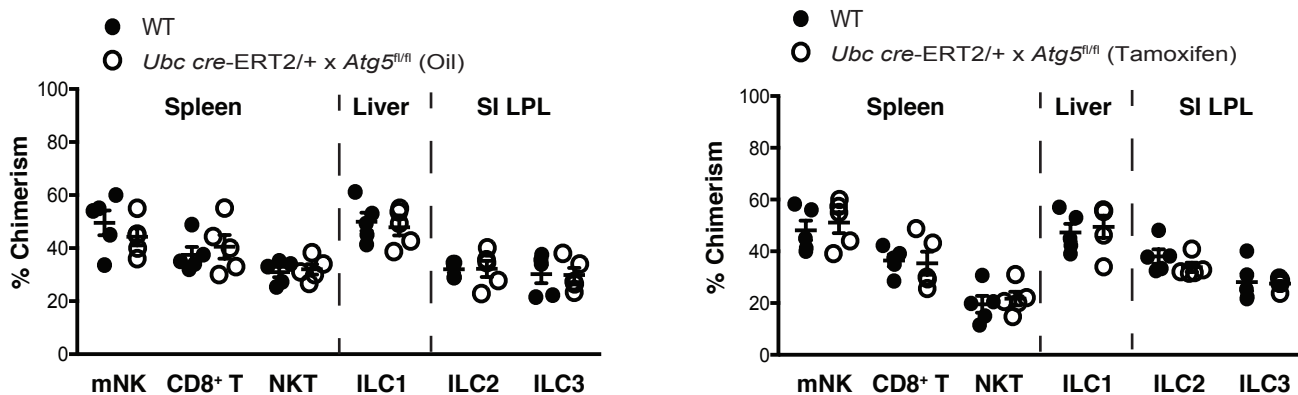

**C**

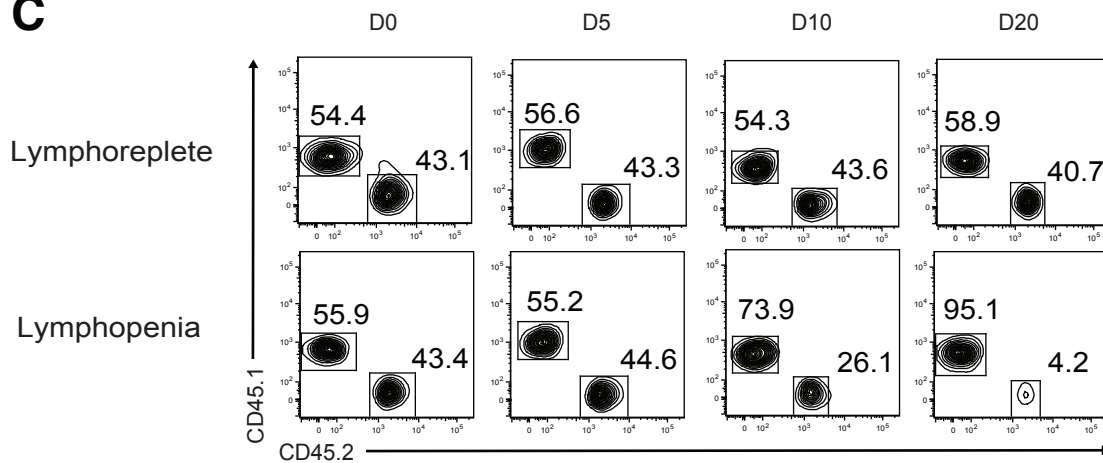

**D**

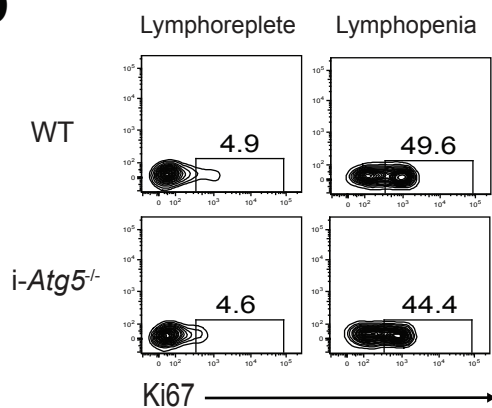

**E**

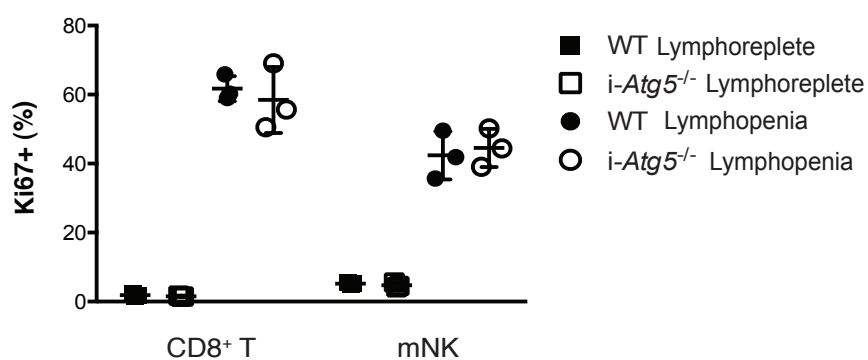

## Supplemental Figure Legends

**Figure S1, related to Figure 1 *Atg5* is required for group 1 ILC development** (A) Representative flow cytometric plots show Eomes and DX5 expression of Lin<sup>-</sup>NK1.1<sup>+</sup> cells and (B) absolute numbers of refined NK precursor (rNKP; Lin<sup>-</sup>NK1.1<sup>+</sup>CD122<sup>+</sup>CD127<sup>+</sup>DX5<sup>-</sup>), immature NK (iNK; Lin<sup>-</sup>NK1.1<sup>+</sup>Eomes<sup>+</sup>DX5<sup>-</sup>), and Lin<sup>-</sup>NK1.1<sup>+</sup>Eomes<sup>-</sup>DX5<sup>-</sup> cells in the bone marrow of NK-*Atg5*<sup>-/-</sup> mice or littermate WT controls. (C) NK-*Atg5*<sup>-/-</sup> mice or littermate WT controls were infected with MCMV i.p. and survival was determined. (D) Viral titers from the blood on day 4 after infection are shown for mice infected with MCMV. (Lin<sup>-</sup> refers to TCRβ<sup>-</sup>CD19<sup>-</sup>CD3ε<sup>-</sup>Ly6G<sup>-</sup>TER119<sup>-</sup>TCRγδ<sup>-</sup> cells). (E) WT mice (CD45.1 x CD45.2) were lethally irradiated and reconstituted with an equal number of bone marrow cells from WT (CD45.1) and *Ubc*<sup>Cre-ERT2</sup> x *Atg5*<sup>fl/fl</sup> (CD45.2) mice. Bone marrow was harvested from chimeric mice and ~1,000 CHILP (Lin<sup>-</sup>NK1.1<sup>-</sup>DX5<sup>-</sup>FLT3<sup>-</sup>CD127<sup>+</sup>α4β7<sup>+</sup>CD25<sup>-</sup>) and ~3,000 ILC2P (Lin<sup>-</sup>NK1.1<sup>-</sup>DX5<sup>-</sup>FLT3<sup>-</sup>CD127<sup>+</sup>α4β7<sup>+</sup>CD25<sup>+</sup>) cells were sorted to >95% purity using the gating strategy shown. Data are representative of two independent experiments, with n=5 per time point. Samples were compared using an unpaired, two-tailed Student's t test, and data presented as the mean ± s.e.m. (\*p < 0.05, \*\*\*p < 0.001, ns = not significant).

**Figure S2, related to Figure 3. Liver ILC1s undergo homeostatic proliferation during lymphopenia** (A) WT (CD45.1) liver lymphocytes were labeled with Cell Trace Violet and adoptively transferred into *Rag2*<sup>-/-</sup> x *Il2rg*<sup>-/-</sup> (CD45.2) recipients. Representative histogram shows Cell Trace Violet fluorescence of indicated adoptively transferred cells harvested from recipient livers on day 5 after transfer. (B) Percentages and (C) absolute numbers of adoptively transferred liver mNK and ILC1 cells harvested from the liver at indicated time points after transfer (D,E) WT:*i-Atg3* mixed bone marrow chimeras were injected i.p. with 1mg of tamoxifen (*i-Atg3*<sup>-/-</sup>) daily for 5 days and splenocytes were adoptively transferred into *Rag2*<sup>-/-</sup> x *Il2rg*<sup>-/-</sup> hosts. (D) Percentages of adoptively transferred WT or *i-Atg3*<sup>-/-</sup> CD8<sup>+</sup> T cells in the blood at indicated time points post-transfer and (E) absolute numbers of indicated lymphocytes from the liver of recipients on d28 post-transfer. Data are representative of two independent experiments, with n=3-4 per group. Samples were compared using an unpaired, two-tailed Student's t test, and data presented as the mean ± s.e.m. (\*\*\*\*p < 0.0001).

**Figure S3, related to Figure 3. *Atg5* is required for the survival of mature ILC2 and ILC3s following cytokine-induced proliferation *in vivo*.** (A-C) Briefly, WT:*i-Atg5* mixed bone marrow chimeras were injected i.p. with either control oil or 1mg of tamoxifen daily for 5 days followed by three i.p. injections of rhIL-7/anti-IL-7 complex every other day (A) Schematic of experiment (B) Representative flow cytometric plots and (C) relative chimerism (tamoxifen treated chimerism of CD45.2<sup>+</sup>/oil treated chimerism of CD45.2<sup>+</sup>) of *i-Atg5*<sup>-/-</sup> ILC3s harvested from the small intestine on indicated days post tamoxifen/oil treatment. (D-F) WT:*i-Atg5* mixed bone marrow chimeras were injected i.p. with either control oil or 1mg of tamoxifen daily for 5 days followed by three i.p. injections of rmIL-33 every other day (D) Schematic of experiment (E) Representative flow cytometric plots and (F) relative chimerism of *i-Atg5*<sup>-/-</sup> ILC2s harvested from indicated peripheral organs on d5 or d20 post tamoxifen/oil treatment. (G-I) WT:*i-Atg5* mixed bone marrow chimeras were injected i.p. with either control oil or 1mg of tamoxifen daily for 5 days followed by three i.p. injections of rmIL-33 every other day and adipose ILC2s were adoptively transferred into *Rag2*<sup>-/-</sup> x *Il2rg*<sup>-/-</sup> recipients i.p. (G) Schematic of experiment (H) Representative flow cytometric plots and (I) relative chimerism (normalized to control oil chimerism) of control oil or tamoxifen treated *i-Atg5* ILC2s harvested from the adipose tissue on d21 following transfer. Data are representative of two independent experiments, with n=3 per cohort. Samples were compared using an unpaired, two-tailed Student's t test, and data presented as the mean ± s.e.m. (\*p < 0.05, \*\*p < 0.01).

**Figure S4, related to Figure 3. *Atg5* is not required for the survival of precursors or mature lymphocytes in lymphoreplete mice.** (A,B) WT:*i-Atg5* mixed bone marrow chimeras were injected i.p. with either oil (as a control) or 1mg of tamoxifen daily for 5 days, and percent chimerism was measured in (A) bone marrow precursors and (B) peripheral mature lymphocytes after 21 days. Indicated cell types are identified as CLP (Lin<sup>-</sup>NK1.1<sup>-</sup>FLT3<sup>+</sup>CD127<sup>+</sup>), NKT cells (TCRβ<sup>+</sup>NK1.1<sup>+</sup>CD3ε<sup>+</sup>), CD8<sup>+</sup> T cells (TCRβ<sup>+</sup>CD8<sup>+</sup>CD3<sup>+</sup>), or as mentioned previously. (C-E) WT:*i-Atg5* mixed bone marrow chimeras were injected i.p. with 1mg of tamoxifen daily for 5 days. (C) Representative flow cytometric plots of mNK cells

in the blood of either tamoxifen treated *i-Atg5*<sup>-/-</sup> mixed bone marrow chimeras (lymphoreplete) or adoptively transferred tamoxifen treated *i-Atg5*<sup>-/-</sup> mNK cells in the blood of *Rag2*<sup>-/-</sup> *x* *Il2rg*<sup>-/-</sup> recipients (lymphopenia) on indicated time points post tamoxifen treatment **(D)** Representative flow cytometric plots show Ki67 intranuclear staining and **(E)** quantification of Ki67<sup>+</sup> WT and *i-Atg5*<sup>-/-</sup> mNK cells on d5 following tamoxifen treatment. Data are representative of two independent experiments, with n=3-5 per group.
